# Supplementary material for: Development of pH-Sensitive Magnetoliposomes Containing Shape Anisotropic Nanoparticles for Potential Application in Combined Cancer Therapy
Source: MDPI journal article supplement (doi:10.3390/nano13061051), 2023-03-15
Supplement: s1 [file s1]

# Development of pH-sensitive magnetoliposomes containing shape anisotropic nanoparticles for potential application in combined cancer therapy

## Supplementary Material

### 1. Photothermal hyperthermia efficiency

**Table S1.** SAR values obtained by photothermal hyperthermia of different nanoparticles under a NIR laser at  $\lambda = 808$  nm and power density of 1 W/cm<sup>2</sup> [60].

| MNPs Composition                                       | SAR (W/g) |
|--------------------------------------------------------|-----------|
| $\gamma$ -Fe <sub>2</sub> O <sub>3</sub> rock-like NPs | ~ 200     |
| CoFe <sub>2</sub> O <sub>4</sub> NPs                   | ~ 650     |
| $\gamma$ -Fe <sub>3</sub> O <sub>4</sub> nanocubes     | 1100      |

### 2. SMLs TEM image and colloidal stability

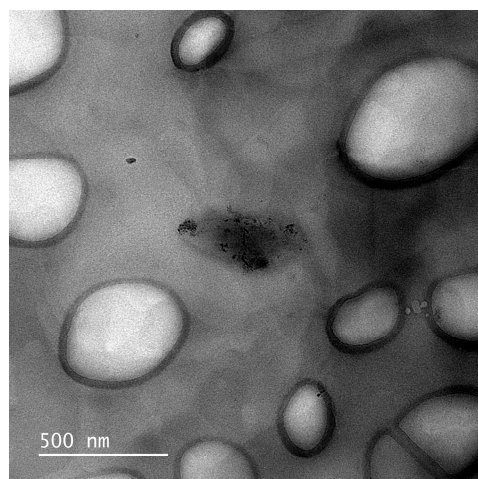

**Figure S1.** TEM image of solid magnetoliposomes containing a DOPE:Ch:CHEMS (45:45:10) lipid bilayer.

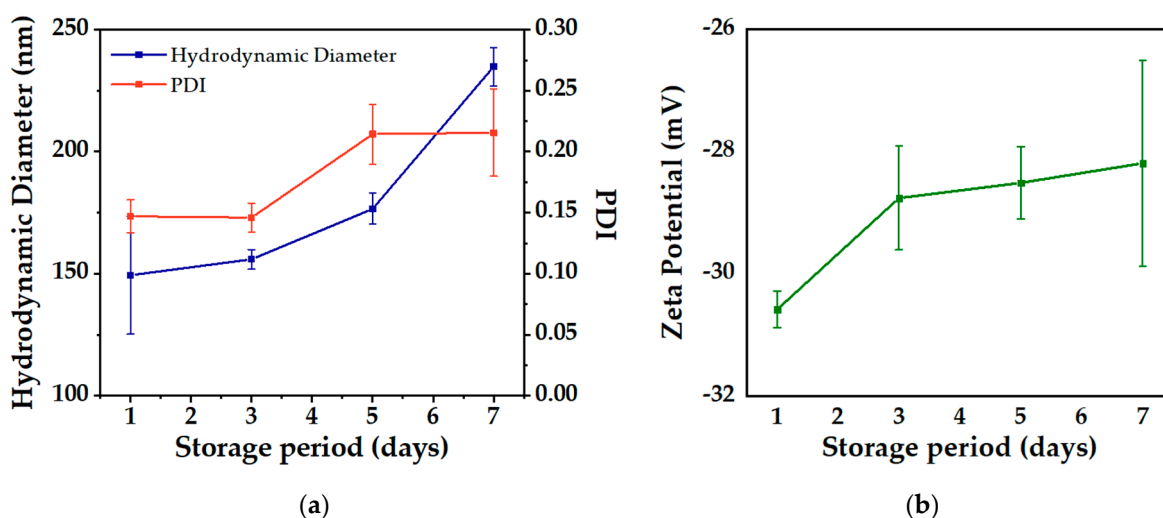

**Figure S2.** Variation, for a storage period of 7 days, of: (a) hydrodynamic diameter (blue) and PDI (red); and (b) zeta potential (green) of an aqueous solution of DOPE:Ch:CHEMS (45:45:10) SMLs at pH=7.4.

### 3. Cell viability

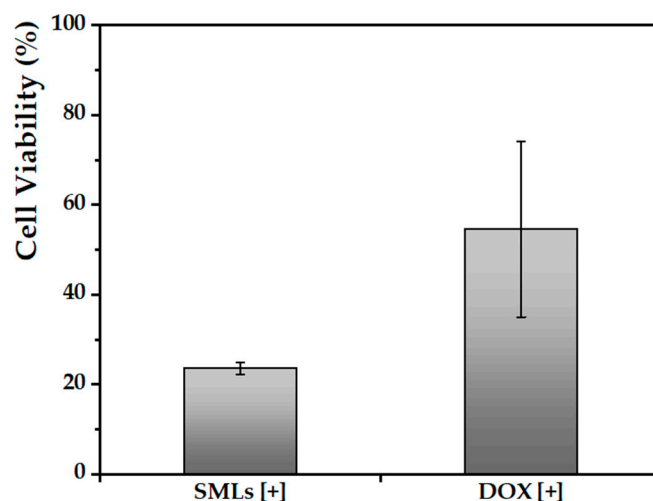

**Figure S3.** Viability of HepG2 cancer cells in the presence of DOX-loaded solid magnetoliposomes at  $1.13 \times 10^{-4}$  M (SMLs [+]), as well as in the presence of drug in free form at the same concentration (DOX [+]).

### References

- [60] Espinosa, A.; Kolosnjaj-Tabi, J.; Abou-Hassan, A.; Sangnier, A.P.; Curcio, A.; Silva, A.K.A.; Corato, R.D.; Neveu, S.; Pellegrino, T.; Liz-Marzán, L.M.; Wilhelm, C. Magnetic (Hyper)Thermia or Photothermia? Progressive Comparison of Iron Oxide and Gold Nanoparticles Heating in Water, in Cells, and In Vivo. *Adv. Func. Mater.* **2018**, *28*, 1803660. [DOI: 10.1002/adfm.201803660]
